# Supplementary material for: Cloud base height retrieval from multi-angle satellite data
Source: Copernicus journal article supplement (doi:10.5194/amt-2018-317), 2018-10-05
Supplement: Supplementary file [file amt-2018-317-AC6-supplement.pdf]

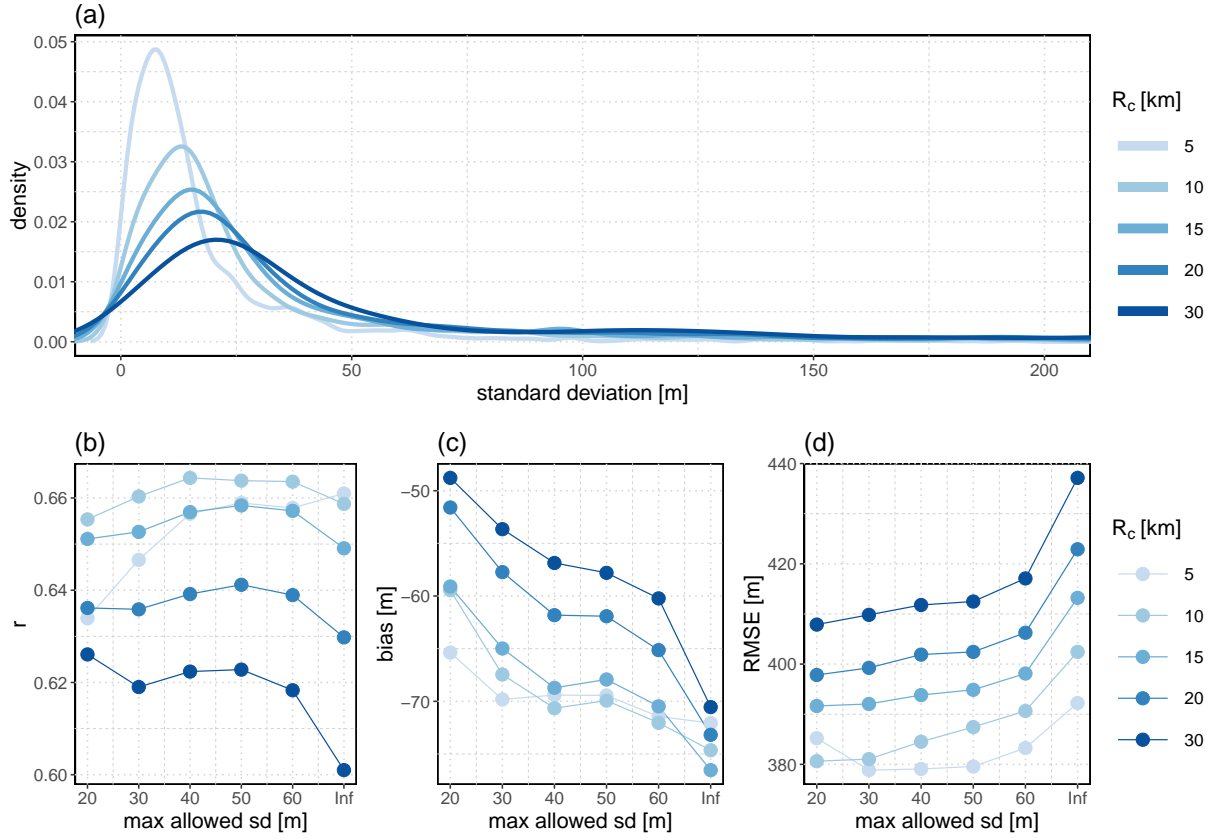

**Figure 1:** a) Normalised frequency of occurrence of the occurring standard deviations (sd) of the average scene elevation (ASE) for various radii. The ASE is provided by the MISR ancillary product. Recalculated are the correlation coefficient  $r$ , bias, RMSE using only ceilometer stations below a threshold sd as denoted on the abscissas.

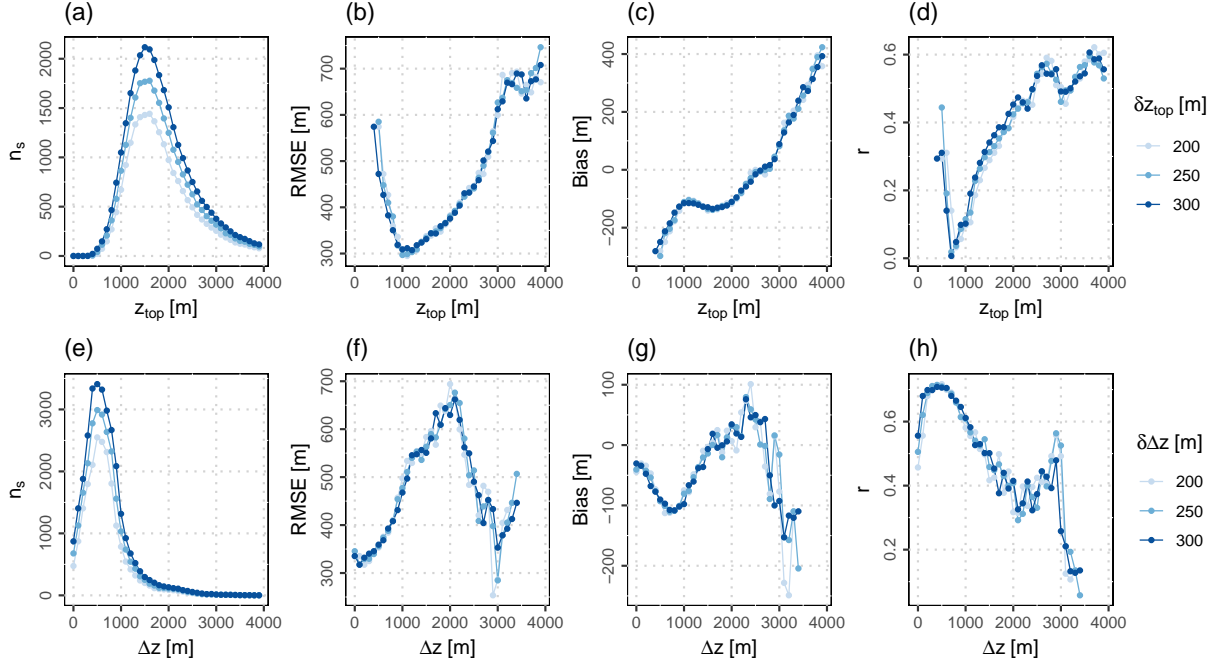

**Figure 2:** Number of samples  $n_s$ , RMSE, bias, correlation coefficient  $r$  for the comparison of MIBase and ceilometer retrievals in dependence on  $z_{\text{top}}$  (top row) and cloud vertical extent  $\Delta z$  (bottom row). Each data point is calculated for a sub sample which includes only  $z_{\text{top}} \pm \delta z_{\text{top}}$  or  $\Delta z \pm \delta \Delta z$ , respectively. The various widths of the considered  $z_{\text{top}}$  or  $\Delta z$  windows are indicated by the blue shading.

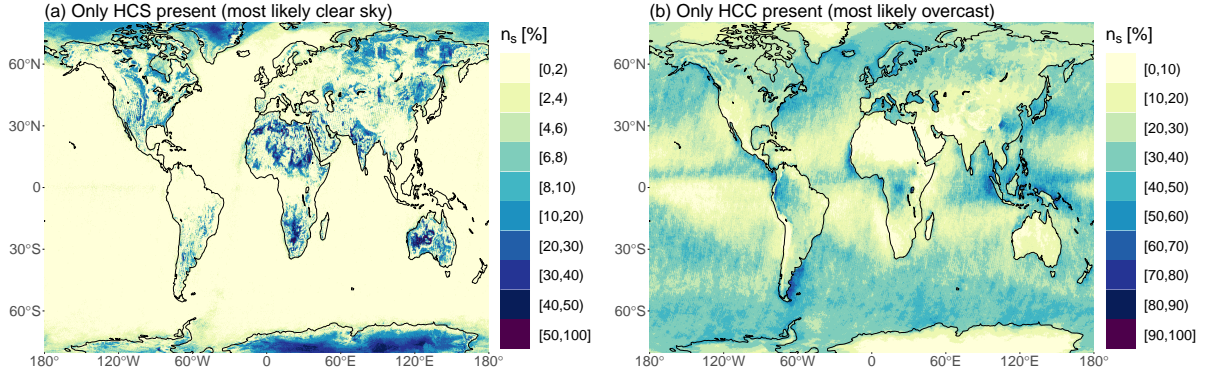

**Figure 3:** Relative occurrences of different stereo-derived cloud mask (SDCM) configurations within the three-year period (2007-2009). The reference sample size  $n_s$  includes all overpasses per grid cell which contain valid  $z$  retrievals and corresponds to 100 %. These configurations are: (a) Only high confidence surface (HCS). These cases should be mainly clear sky cases. (b) Only high confidence cloud (HCC). These cases should be mainly cloud scenes with apparent overcast.

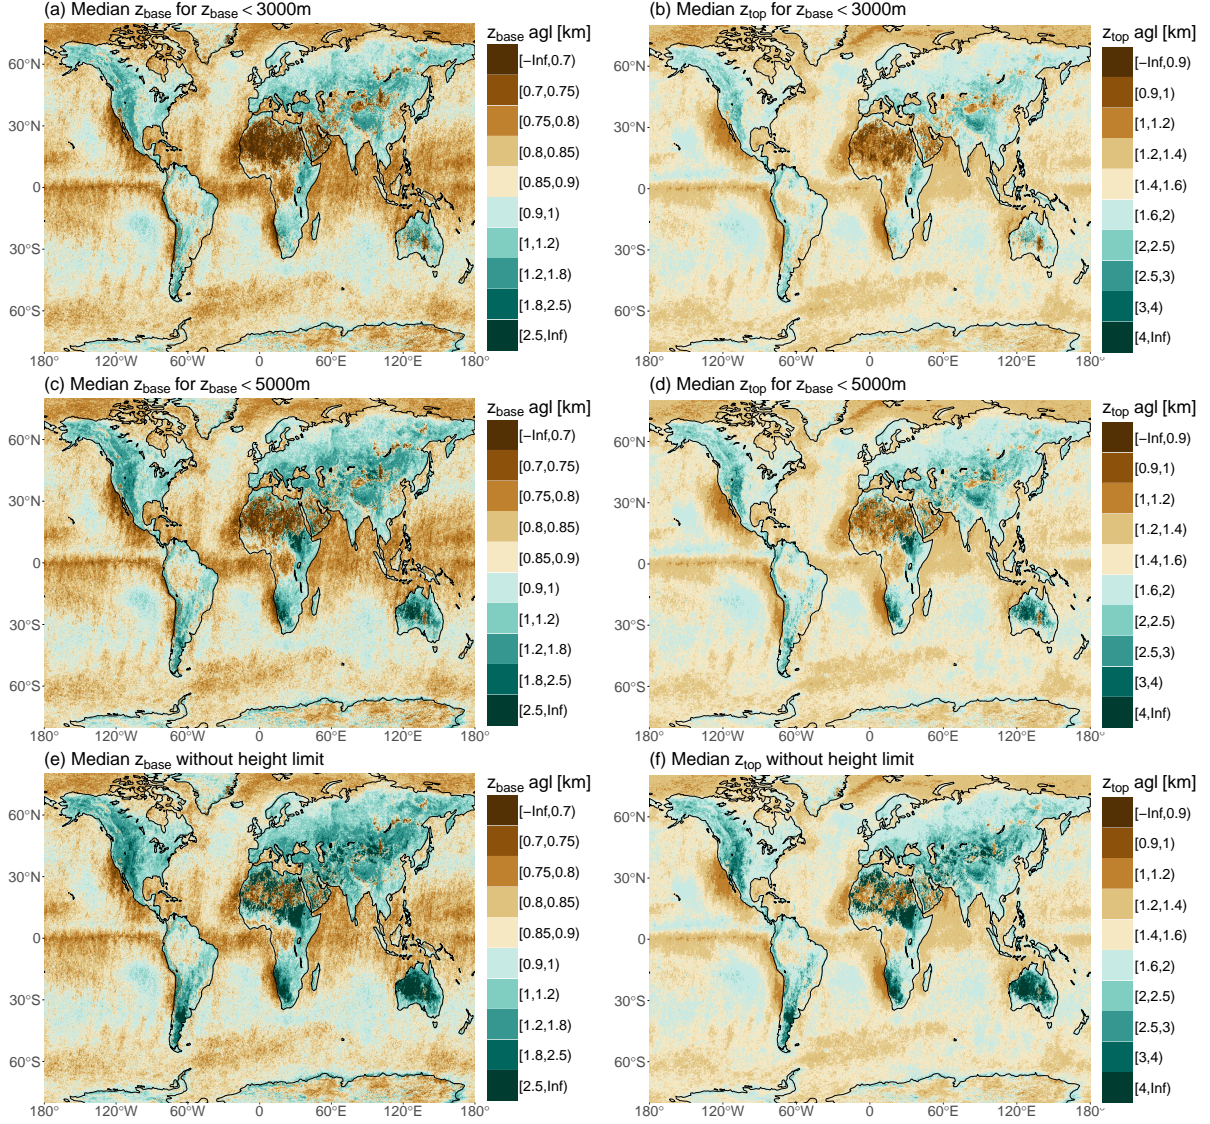

**Figure 4:** Global distribution of median cloud heights for a 3-year period (2007–2009). Shown are  $z_{\text{base}}$  (left) and  $z_{\text{top}}$  (right) on a  $0.25^\circ \times 0.25^\circ$  latitude–longitude grid.  $z_{\text{base}}$  and  $z_{\text{top}}$  are above ground level (agl).  $z_{\text{base}}$  and  $z_{\text{top}}$  retrievals are only included in the statistic if  $z_{\text{base}}$  is below 3000 m (a, b), 5000 m (c, d). For (e) and (f), all  $z_{\text{base}}$  and  $z_{\text{top}}$  retrievals are included without an upper height limit.
